# Supplementary material for: BCC0 collaborates with IMC32 and IMC43 to form the Toxoplasma gondii essential daughter bud assembly complex
Source: PubMed Central journal article supplement (PMC11288415; doi:10.1371/journal.ppat.1012411), 2024-07-18
Supplement: ppat.1012411.s002.pdf [file ppat.1012411.s002.pdf]

|              |                                                                                                                            |      |
|--------------|----------------------------------------------------------------------------------------------------------------------------|------|
| TGGT1_294860 | MGRSDLIETCCRLQRSCKDLQCSLDELREDEGARLGAEKADLEREVAQTELLERLHRDDGVVGNFFKDIGIHQISDFIQHVRTQTPEAAAAAAAAAAAAAAAAAFGSSASALMKETQKHQFG | 120  |
| NCLIV_001740 | MGRHDLIETCCRLQRSCKDLQCSLDELHDEDARLRAERTDLERQVAETQVLLERLHRDDGVVGNFFKDIGIHQISDFIQVVRTQTPEAAAAAAAAAAAAAAAAAFGSSASALMKETQKHQFG | 120  |
| TGGT1_294860 | IRREPVLDSLRRQAAGLREQQG-PVFQATQRKGEALLSSAERAASD-SIFTASSSSLAGKTPTEAAKEIARAMTEAATEAWHRTSSQRLGLAGAGEKKAKHEEAKASPLLESEEKQE      | 238  |
| NCLIV_001740 | VRRDALPDRHGRLEAGGFPCGKDQDRNPVNTTGDALNSRERVADVPEAQTGSSSLSGKTPAEAAKEIARAMTEAATEAWHRTSSQRLGLAGAGEKTEVEGKQTH-QEGEEKKEKE        | 239  |
| TGGT1_294860 | ERSRQDPFSDLVMRVAVGQGGSSVRALLQRKQTEERLQRQIAQWLDASSLSIEEVPSPQAFVPSLASGLTPALSTVTSYSSSGASLAVTPGVSLPVDPPRESEAVRGEPCGEAGAN       | 358  |
| NCLIV_001740 | GRNWQDPFSDLVMKAVGQGGSSVRALLQRKQTEERLQRQIAQWLDASSLSIEEVPSPQAFPLPLGLASGLTAAPPSPVFSSSSLAASGVSPGVCMDAQPTDSQAGSGESVCAEGDG       | 359  |
| TGGT1_294860 | SEKATQEGPAEVFEVPEAGADVPLSTHEERQARQLCDARLLAMQVEKALGMLDIGRFAPQYLPSAACSAPADAYSTQKKDGSAPGEGDS-RAEGKRDGDACSGFIDGSSLDDLCARVFG    | 477  |
| NCLIV_001740 | GKAAQDTASNLQAGGQGDGPSTLSAEERQARQLCDARLLAMQVEKALGMFDIGRFAPQYVAAA--PAASYLLKGDASARPHGERAPDRTRDRDASGFADG-SLDDL CARVFG          | 475  |
| TGGT1_294860 | EQRNDTPVQIEAPQREKLRPQERQDSKADSDKDAVEMKELHKGRTASCVDAGSRGG-GGVLETSSKENDEGEQESERSPLCEGAASPAESQAEQQ--PSDANGLSQPSSQEDGGFYA      | 594  |
| NCLIV_001740 | GNAQTKKAPGS-QQKKQSPETGGLRSKA--DAETVEE---AQETGGAN-SDAMSRGDAPSLLEAKSNRAGVESDSSLPSRLCQAGLTSQAQSPAPSQKLPREDFPSPQPREEEARASP     | 588  |
| TGGT1_294860 | ASSELREDGDLETSSP--E--KTKIVFEREKPREEGREPASVPPAEQAEETPSAVHALAPASVWTEGPPALGARGKKEAEIETGRLEEAHGDTTGGAPGASKSRNETASLPASSSPF      | 709  |
| NCLIV_001740 | --APIRSREGEACVQATRSSCCMQLSECESSQEEAAETASVPHTQAAGPTKALDALAQTHSPHQDPLGVKGEVEVAKEESSLK-ETLADTAPQVGVCDSPKSNATSQAQSAKSCF        | 705  |
| TGGT1_294860 | SPASAMTECQLLPDGAFLSWKFGPEPRALVAAAPAGTCRQLEQVSVLDTAQFEAASLKVSSSKTASPSGLLAPMQKTRAAATLLDLSQLEREYHLTLIARCMQLTFSTGVEEDCGE       | 829  |
| NCLIV_001740 | SPSPMPTVTKLLPDGAVFLSWQFGPEPRTLASAPPACRQLEQVMSLDLTAQFEAATMRS---AAAPSGIQPMPQKTRASTLLLESQGREYHLTLIVRCLFETFTGVEEDCGA           | 821  |
| TGGT1_294860 | PVCGVTVHFRHLHADGLRSLRMRPVSLSTLAF-FPT--RRHAAPLPASTPHNAPAPTSYHSPSLNNGNGSSAVTDQEYCSASSPPASSSLASSSSSVASSFARASAVRQKAGQPQVQ      | 946  |
| NCLIV_001740 | PVCGVTVHFRHLHADGLRSLRMRPVSLSTLAFPPATRQVAAPLPAANTPTATLAPPAH-PSVCKEENATFLAGLD---PSSPAAPDRVS-----AASASPGRDASAPPAL             | 927  |
| TGGT1_294860 | PPCAHVDEIVRADELRGVAACLPEMKTFFSQQAVFSPSSARAESDVPRS-AEERVQSEAPKAPVGCIEIETPT--NCVPAEATSSLSQWTSDESPCWRASSPNEFFSPIPTDAGCTNA     | 1063 |
| NCLIV_001740 | TPCAALGGAGRARERESECGDLSRGLRAPTQVNCVSSSRADREVDQKDAQERDGGSLGRSTCSCTDVEAGQGRSVP-NGGSSSLAVSTPAGTPWRACPGDDFLVRPVPGRAGHGPE       | 1046 |
| TGGT1_294860 | RTQ--VAGFASHPTPETTAFHVAARPLSAASDTRGLLT-----VAFQSPGEGERVGVGKEGGTRSFSPSGSEEV---TLSTGRSEVGVEARPRTLGVSPGLGRENISR               | 1163 |
| NCLIV_001740 | ERSRRAVEAALTTKLQAESAPFLSVAARPLCGPTGGLVGPAPPAASDPLTVAASVAPQPEAEIRG-----GGPAESVPPGSAALGSVELLSSSGKAGAVRCRRVLGVAGGERPVCS       | 1160 |
| TGGT1_294860 | SAPFHSSFGVRSRSPQLEPTSH-APSVGLPVGASAGGTLGSLVLPVQAPGYPVSGVRDNLPSPLHPSSVSAVSSSVLFFPQPAQGNLVPHATRLRARASPPQSAP---TVCLDSAPESL    | 1278 |
| NCLIV_001740 | VSRHAADERFTR-VSGMEPSSLSSRLLGQPAVASA--ACPGSRPLSQASPAYAGVGRDLPSFASPLSAVSSSALF-PHTWQSSLSQSASP-ESSPGPQSGSATHEGRGLDPAAPETR      | 1275 |
| TGGT1_294860 | PLARSTAALSDVVEESLKSFE--ASAWQLARGGARAHQATLDGGEAS-----SPSRLRGRGL-TSLGCLYTRT-DTEQGEAEERSDASAFRTSQEPGDACAAPGVSGCRLGGS          | 1381 |
| NCLIV_001740 | PVAGASVLSSEAVVSLKNLVDVSDAAWALVRGVAQASQAALESAESLGGIGGCGRHATQGVRRGRGLHESLGLCHARRTDAEGPEAETDERSLS-----ARLPAPGESTSHLGAS        | 1389 |
| TGGT1_294860 | LGSAAKASS--LGAEGGGRV-RSSSFRREQQVQCRKQLWAMPESVVRALSSSTSKTLSAGEAHPAATPALQPNADFAAQGTVESRLPGSPVPAVQSGSSDADSLASGLPCGSPS         | 1498 |
| NCLIV_001740 | LGSAAPARGPCGNAPDGRVRRSSLSRREQKHQKCRKQLWAMPDSIRVLAALNPSAGT-VASGEATQPSVREQPV-----GRRP-AVSAPVGSVSA--QSCLPN-IDASRSSSFGSPS      | 1498 |
